# Supplementary material for: Brain pericytes serve as microglia-generating multipotent vascular stem cells following ischemic stroke
Source: Springer Nature journal article supplement (doi:10.1186/s12974-016-0523-9), 2016-03-07

## Supplementary Figure 2

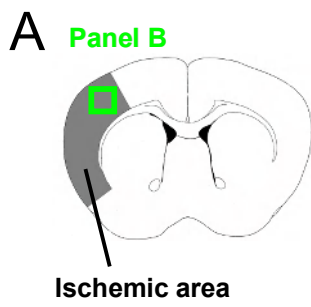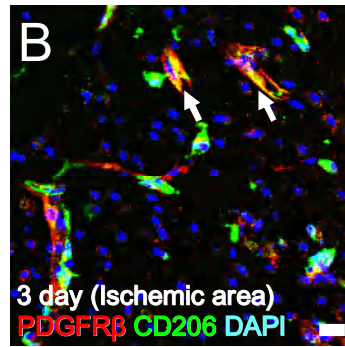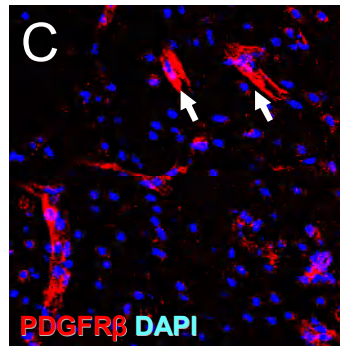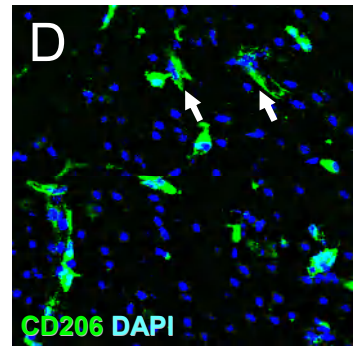

Supplement: MOESM3 [file 9769100]
